# Supplementary material for: Mussel-inspired functionalization of carbon nanotubes for hydroxyapatite mineralization
Source: Royal Society of Chemistry journal article supplement (doi:10.1039/c0jm01339k), 2010-01-01
Supplement: c0jm01339k.pdf [file c0jm01339k.pdf]

## Electronic Supplementary Information

### Mussel-inspired functionalization of carbon nanotubes for hydroxyapatite mineralization

*Minah Lee, Sook Hee Ku, Jungki Ryu, and Chan Beum Park\**

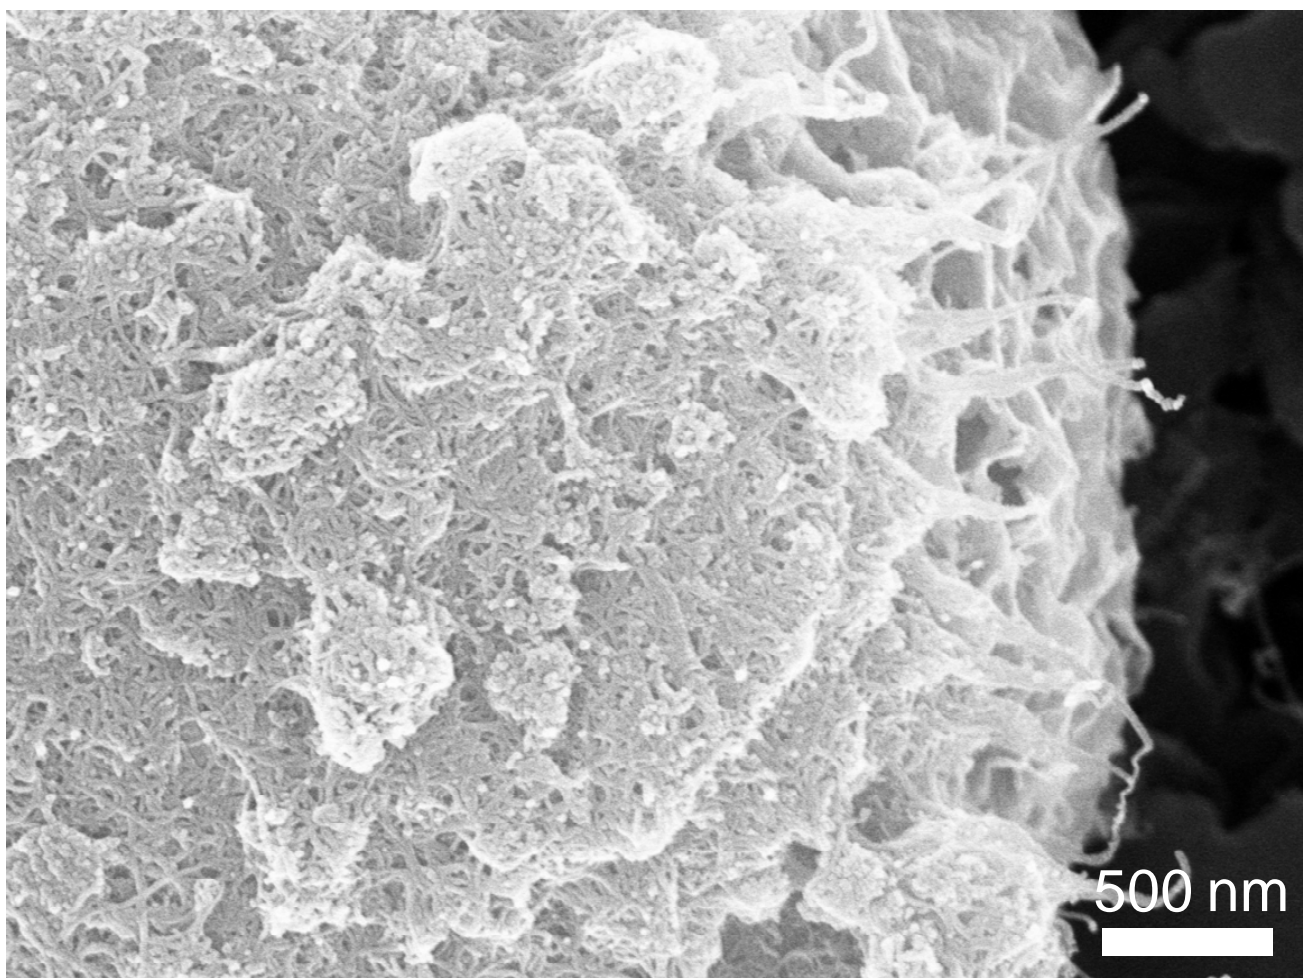

**Figure S1.** An enlarged SEM image of HAp mineralized with CNT-PDA for 7 days. HAp agglomerates were highly intercalated with a network of CNT-PDA nanofibers.

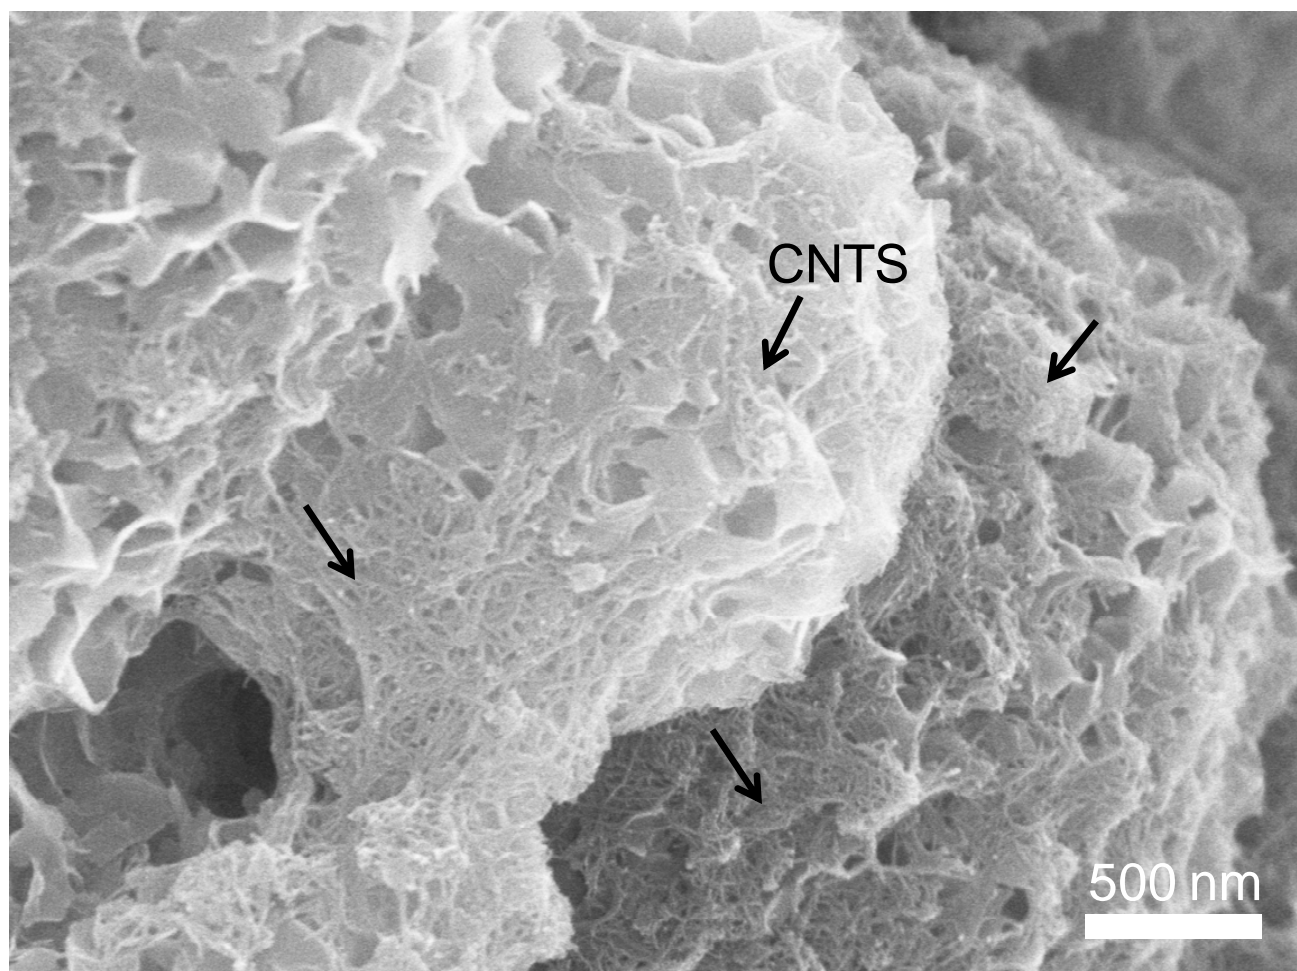

**Figure S2.** An enlarged SEM image of HAp mineralized with CNT-PDA for 7 days. HAp minerals were successfully developed with an intercalating CNT-PDA network, as indicated with black arrows.
